# Supplementary material for: A Simple Decision Tree Model for Detection of Movement Behaviors in Non-Ambulatory Children with Cerebral Palsy
Source: Research Square preprint supplement (doi:10.21203/rs.3.rs-8728430/v1), 2026-02-04
Supplement: Supplementary file 1 [file 6a1b7ba85a39522c76786f54.pdf]

| Class/ code                                    | Examples                                                            | Rules                                                                                                            |
|------------------------------------------------|---------------------------------------------------------------------|------------------------------------------------------------------------------------------------------------------|
| <b>1. Lying down</b>                           | Lie still on floor                                                  | Lying still prone or supine on floor (with tummy/back on floor or propped)                                       |
|                                                | Lie with slow limb movement, trunk, or neck movement                | Lying while moving neck, arms or legs but NOT moving around                                                      |
| <b>2. Quiet Sitting</b>                        | Sit still on floor, chair, bench, or wheelchair                     | Bottom is fully resting on seat and feet on the floor                                                            |
|                                                | Sit quietly w slow limb movement, trunk, or neck movement           | Sitting on floor/bench with slow movement of arms, legs, or trunk                                                |
| <b>3. Active Sitting</b>                       | Shuffling side to side on bench while seated                        | Seated, moving up and down a bench                                                                               |
|                                                | Sitting and reaching (fast/large movement)                          | Reaching and moving centre of gravity fast                                                                       |
|                                                | Sitting and kicking legs or pushing with legs (fast/large movement) | Sitting and kicking legs or pushing chair or other device with legs                                              |
| <b>4. Floor mobility</b>                       | Crawling position (on all fours) or kneeling (on knees)             | Being still in crawling position or kneeling                                                                     |
|                                                | Crawling                                                            | Crawling on hands and knees going from place to place or attempts to do so.                                      |
|                                                | Commando crawl                                                      | Moving from place to place with belly on ground or attempts to do so                                             |
|                                                | Walking on knees                                                    | 2-point walking on knees moving from place to place, or attempts to do so                                        |
|                                                | Pivot on belly                                                      | Belly on the floor, turning around their own axis                                                                |
|                                                | Bottom or side shuffling with trunk off floor                       | On bottom, moving with intent, or attempts to do so                                                              |
|                                                | Transition belly/back                                               | Rolling from belly to back or vice versa                                                                         |
| <b>5. Transition</b>                           | Floor to/from sitting                                               | Moving from floor to sitting or vice versa (or attempts to do so)                                                |
|                                                | Floor to/from standing                                              | Moving from floor to standing or vice versa (or attempts to do so)                                               |
|                                                | Sit-to-stand/ stand-to-sit                                          | Moving from sitting to standing or vice versa (or attempts to do so)                                             |
|                                                | Transfer chair to/from wheelchair                                   | Moving from one seat to another (or attempts to do so)                                                           |
| <b>6. Standing utilitarian movements (SUM)</b> | Stand still                                                         | Standing still with no arm or leg movement (except gentle sway)                                                  |
|                                                | Standing w slow limb or trunk movement                              | Standing with limb or trunk movement including step or standing on one leg (by table/ bench)                     |
|                                                | Reposition in standing                                              | Shuffling around or reposition in standing or semi-standing but NOT going place to place                         |
|                                                | Shuffling side to side                                              | Going side to side, shifting weight on feet                                                                      |
|                                                | Walking slowly                                                      | Meandering, not walking with “purpose” from place to place                                                       |
|                                                | Sidestep                                                            | Stepping sideways, even when holding onto a high bench or the examiners hands                                    |
|                                                | Picking something up from the floor or Squat                        | Standing and reaching down                                                                                       |
|                                                | Kicking a ball                                                      | Kicking ball from still/standing position                                                                        |
| <b>7. Jumping</b>                              | Jump/hop/leap                                                       | Jump, hop, leap – usually on the spot                                                                            |
|                                                | Gallop/side gallop/skip                                             | Gallop, side gallop or skipping – usually moving from one place to another                                       |
| <b>8. Walk</b>                                 | Walk                                                                | Walking at a constant speed or cadence - going from place to place with or without assistive device or supported |
| <b>9. TM Walk</b>                              | Treadmill Walking                                                   | Walking on TM or elliptical device while in harness or supported                                                 |
| <b>10. Wheelchair</b>                          | Wheelchair                                                          | Manual propulsion while seated in wheelchair – to get to one place to another, otherwise code as sitting.        |
| <b>11. Cycling</b>                             | Cycling                                                             | Cycling on modified trike or recumbent bike.                                                                     |
| <b>12. Out of View</b>                         | Out of view / No code fits                                          | Cannot determine activity or out of view                                                                         |
